# Supplementary material
Source: PubMed Central journal article supplement (PMC6760863)
Supplement: NIHMS1520449-supplement-2.pdf [file NIHMS1520449-supplement-2.pdf]

1 **Supplemental Figure 1: Objectively Measured Nighttime Room Entry Data Collection**

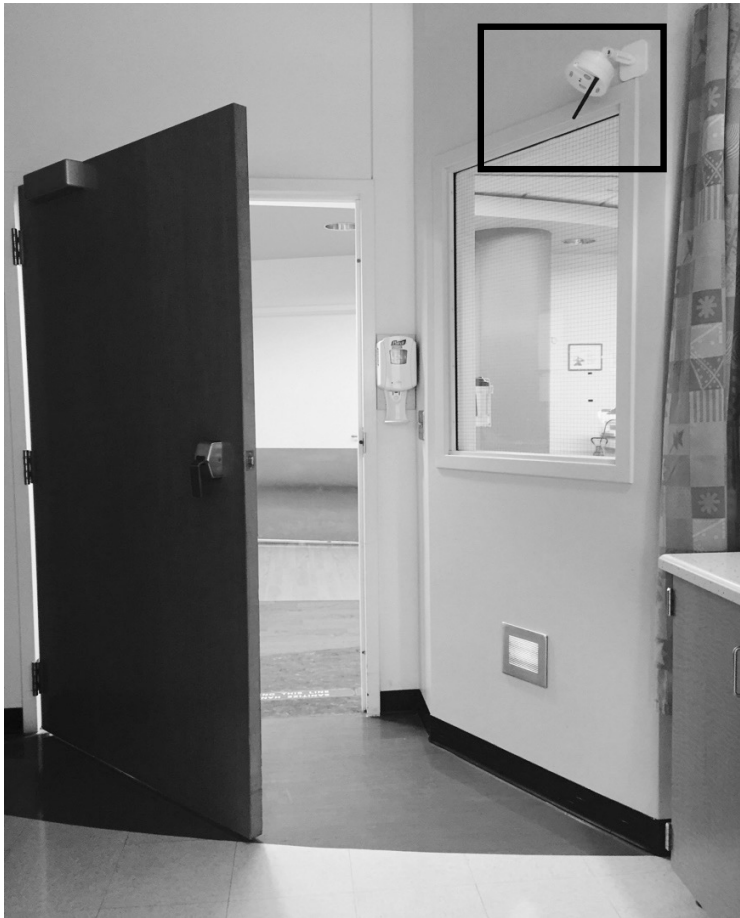

2

3 Objective data on nighttime traffic into patient rooms were collected using data from Activity Counters within the  
4 GOJO Hand-Hygiene system (GOJO Industries Inc., 2017, Akron, OH). These activity counters are heat sensors  
5 inside each patient room on the general pediatric ward. The Activity Counters record time-stamped room entries and  
6 exits and are used by the hospital to track hand-hygiene compliance amongst the staff. Data from these devices were  
7 obtained from the hospital to measure nighttime room entries.

8

9

10
